# Supplementary material for: Regeneration of Cochlear Hair Cells in Adult Mice by Chemical Mediated Reprogramming
Source: Research Square preprint supplement (doi:10.21203/rs.3.rs-1662674/v1), 2022-06-03
Supplement: Supplementary file 1 [file fa0b007cd710af347de5f996.docx]

Please find seq data at GSE205187, publicly available.
